# Supplementary material for: Mitotic regulation of fungal cell-to-cell connectivity through septal pores involves the NIMA kinase
Source: PubMed Central journal article supplement — Mol Biol Cell. 2014 Mar 15;25(6):763–75. doi: 10.1091/mbc.E13-12-0718 (PMC3952847; doi:10.1091/mbc.e13-12-0718), 2014-03-15
Supplement: supp_E13-12-0718v1_CombinedSupMats.pdf.pdf [file supp_E13-12-0718v1_CombinedSupMats.pdf.pdf]

# Supplemental Materials

*Molecular Biology of the Cell*

Shen et al.

**Supplemental Table 1: Primers Used in This Study**

| Name  | Purpose                               | Sequence                                                      |
|-------|---------------------------------------|---------------------------------------------------------------|
| HP15  | <i>nimA</i> GFP-tagging               | GAACACCATTCTACATGTCTCCAG                                      |
| HP16  | <i>nimA</i> GFP-tagging               | CCTCAATTGCGAATCACCTTTC                                        |
| HP17  | <i>nimA</i> GFP-tagging               | TGAAAACGCAAGATCCTAACC                                         |
| HP18  | <i>nimA</i> GFP-tagging               | TGGCGTACGAGCGCTTCAAACCTG                                      |
| HP19  | <i>nimA</i> GFP-tagging               | GGGAAGAAAGGTGATTCGCAACTTGAGGGGAGCTGGTGCAGG<br>CGCTGGAGCCAAAG  |
| HP20  | <i>nimA</i> GFP-tagging               | ACCGCCGGTTAGGACGATCTTGCGTTTTCACTGTCTGAGAGGAG<br>GCACTGATGCGTG |
| KP44  | HexA GFP-tagging<br>and HexA deletion | ACTTGACCTTGCCTG                                               |
| KP45  | HexA deletion                         | CCTACCTCACCTCACCTTGC                                          |
| KP46  | HexA deletion                         | GAAGAGCATTGTTTGAGGCGCTTGCGAGCCTTGGGGTGAT                      |
| KP47  | HexA GFP-tagging                      | GTTACCGTGACGGCGTCAAG                                          |
| KP48  | HexA GFP-tagging                      | GGCTCCAGCGCCTGCACCAGCTCCTAGACGGGAAGAGTGGATG<br>A              |
| KP49  | HexA GFP-tagging<br>and HexA deletion | GCATCAGTGCCTCCTCTCAGTAAGCTGTCTACAGGGGTTC                      |
| KP50  | HexA-GFP-tagging<br>and HexA deletion | GATAGCCTACCTGTGG                                              |
| KP51  | HexA GFP-tagging<br>and HexA deletion | CTGTGCTCCATTACATGCCA                                          |
| KP52  | HexA-GFP-PTS1-<br>tagging             | CCTGTAGACAGCTTAGAGGCGAGATTTGTATAGTTCATCCATGC                  |
| KP53  | HexA-GFP-PTS1-<br>tagging             | GATGAACTATACAAATCTCGCCTCTAAGCTGTCTACAGGGGTTC                  |
| KP54  | HexA-GFP-PTS1-<br>tagging             | CAAGGAGCCGAATCAGATCA                                          |
| KP55  | HexA-GFP-PTS1-<br>tagging             | AGGCGAAGGTGAGATTCAGG                                          |
| KP56  | SepA GFP-tagging                      | GAATGTGCAGGCGAGCTTGG                                          |
| KP57  | SepA GFP-tagging                      | CCGTGTCAGCCAGATTA                                             |
| KP58  | SepA GFP-tagging                      | GGCTCCAGCGCCTGCACCAGCTCCGCTGGTTCGAGGGGCGATGT<br>TC            |
| KP59  | SepA GFP-tagging                      | GCATCAGTGCCTCCTCTCAGTAGCTGTTTCTCAAGCAAAG                      |
| KP60  | SepA GFP-tagging                      | GTAGATGGTGCGAACGGCTG                                          |
| KP61  | SepA GFP-tagging                      | GCTTGCCACAAGTTTCGTC                                           |
| KP137 | MyoB chRFP-<br>tagging                | CGCCTCCGAGAAGAACTTGA                                          |
| KP138 | MyoB chRFP-<br>tagging                | GCCAAGGAGAAGTCACGTAT                                          |
| KP139 | MyoB chRFP-<br>tagging                | GGCTCCAGCGCCTGCACCAGCTCCAAGAAAACCTTTGGTGTTC<br>TA             |
| KP140 | MyoB chRFP-<br>tagging                | GCATCAGTGCCTCCTCTCAGTGAGCGAAAGCCGCTTGTTAAG                    |
| KP141 | MyoB chRFP-<br>tagging                | CCACTTCTCGCGCATGAGTT                                          |
| KP142 | MyoB chRFP-<br>tagging                | CACCACCAGGTATCTCACGA                                          |
| KP156 | SO deletion                           | GGTCAAGATGGCGGCATTGG                                          |
| KP157 | SO deletion                           | CAAGCGGCGACGACAAGTTC                                          |
| KP158 | SO deletion                           | GAAGAGCATTGTTTGAGGCGCGTGACGGCAGTGTTCCTC                       |
| KP162 | SO deletion                           | GCATCAGTGCCTCCTCTCAGTGATTGATGCCGAGTCTTTTTAATG                 |
| KP163 | SO deletion                           | TAGACACCGTGTTCGGCCTG                                          |
| KP164 | SO deletion                           | CCGCTCTCGCAGGAACAGAA                                          |

|       |                                                |                                                |
|-------|------------------------------------------------|------------------------------------------------|
| KP165 | Express GFP-S-Tag under the promoter of AN1553 | GCACCGGATCGCAGCAATTC                           |
| KP166 | Express GFP-S-Tag under the promoter of AN1553 | GCGGACACAAGCGACATAGT                           |
| KP167 | Express GFP-S-Tag under the promoter of AN1553 | GAAAAGTTCTTCTCCTTTACTCCCCGGTTCATCTTGAATGAATTG  |
| KP168 | Express GFP-S-Tag under the promoter of AN1553 | GCATCAGTGCCTCCTCTCAGGCAGACCCCCTTGACGGCCAAT     |
| KP169 | Express GFP-S-Tag under the promoter of AN1553 | GGTGGATCGAACGGTATATG                           |
| KP170 | Express GFP-S-Tag under the promoter of AN1553 | CGTGGTTGGCTTGCACTAGG                           |
| SO445 | SPA3 GFP-tagging                               | CCTTCATCAGGATCACGACG                           |
| SO446 | SPA3 GFP-tagging                               | CACGATAGACAGCCATGGAG                           |
| SO447 | SPA3 GFP-tagging                               | ATCAGTGCCTCCTCTCAGACAGTAACTGATGGAAGCCGAGA      |
| SO448 | SPA3 GFP-tagging                               | CTCCAGCGCCTGCACCAGCTCCACTCTTCTGCGACGATCTTGGC   |
| SO449 | SPA3 GFP-tagging                               | CTGCGCCTAATTCTCGTCTC                           |
| SO450 | SPA3 GFP-tagging                               | CGTCATGGCCACATCAGATC                           |
| SO457 | SPA10 GFP-tagging                              | GGACGACATGGAAGCTCTGC                           |
| SO458 | SPA10 GFP-tagging                              | CTGTTCCAGAAGCCGATGAG                           |
| SO459 | SPA10 GFP-tagging                              | ATCAGTGCCTCCTCTCAGACAGTAATAAGTGCGCGAGTTTGAC    |
| SO460 | SPA10 GFP-tagging                              | CTCCAGCGCCTGCACCAGCTCCGTAGTCATGCTCCTCGTCAAC    |
| SO461 | SPA10 GFP-tagging                              | CCCGAGTTCATTGATGCGTG                           |
| SO462 | SPA10 GFP-tagging                              | GAAAAACACCTGCTTGTCCC                           |
| SO469 | SPA13 GFP-tagging                              | CGGCTAGAGGATCATAGACG                           |
| SO470 | SPA13 GFP-tagging                              | CGCGAGCTCTCCGATTACAG                           |
| SO471 | SPA13 GFP-tagging                              | ATCAGTGCCTCCTCTCAGACAGTGAACATGAACATGACCATCAC   |
| SO472 | SPA13 GFP-tagging                              | CTCCAGCGCCTGCACCAGCTCCTTTCATTGTATGGCTTTTTCTGAC |
| SO473 | SPA13 GFP-tagging                              | GAACGGACTATCCAGCTAGC                           |
| SO474 | SPA13 GFP-tagging                              | GAAGCTGGTTTTGAGAGCGG                           |
| SO505 | KfsA GFP-tagging                               | CAGAGCGACAGATCCAAGAC                           |
| SO506 | KfsA GFP-tagging                               | GAAACCTACCGGCAAGAAC                            |
| SO507 | KfsA GFP-tagging                               | ATCAGTGCCTCCTCTCAGACAGTAGAGGGGCCAGCTGCTCTA     |
| SO508 | KfsA GFP-tagging                               | CTCCAGCGCCTGCACCAGCTCCGCGGTCGTCCCCAACTCTGGATTT |
| SO509 | KfsA GFP-tagging                               | CACACAGTACGCGAACGAAG                           |
| SO510 | KfsA GFP-tagging                               | CCACGCAACTTCTGTGCTCG                           |

Supplemental Figures:

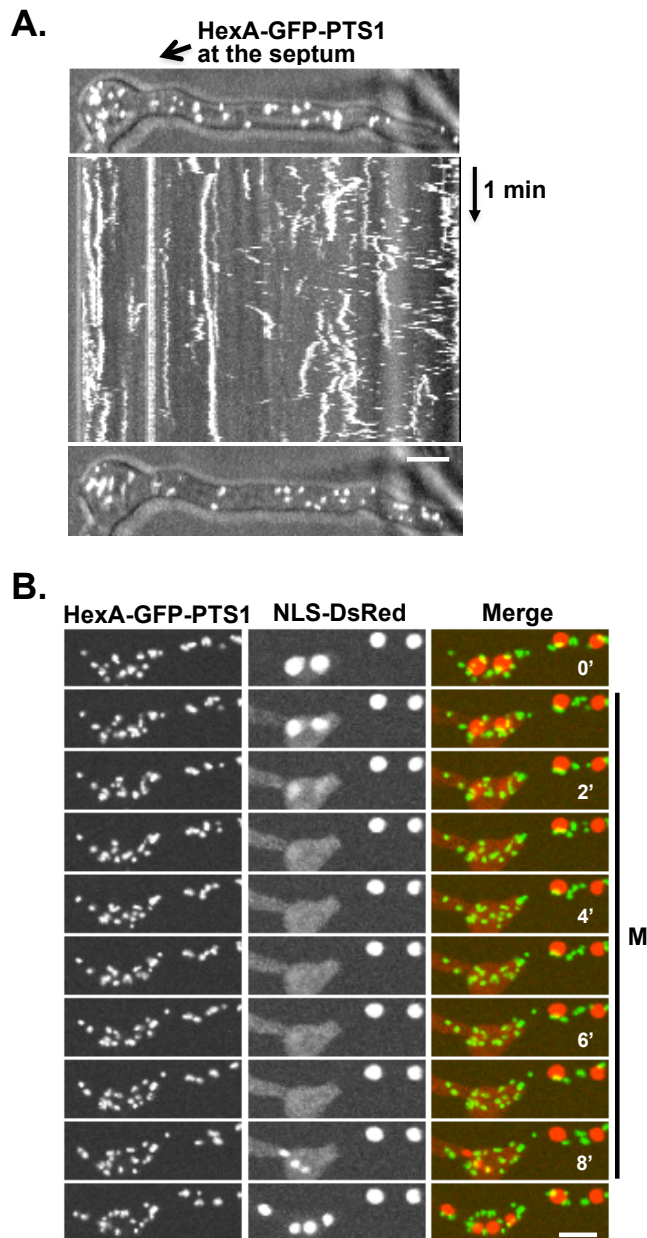

**Figure S1. Immobile Woronin bodies locate adjacent to septa during interphase and mitosis.** (A) A kymograph of HexA-GFP-PTS1 and the corresponding DIC image of strain KF095 showing HexA-GFP-PTS1 labelled Woronin bodies located adjacent to septum do not move while all other Woronin bodies are not as stationary. Images were captured at 2 sec intervals. (B) Time-lapse images of strain KF95 showing HexA-GFP-PTS1 labeled Woronin bodies and NLS-DsRed during mitosis. The Woronin bodies located near a septum stay adjacent to the septum during mitosis. Images were collected with 10 sec delays with images displayed at one minute intervals. Bars, 5  $\mu$ m.

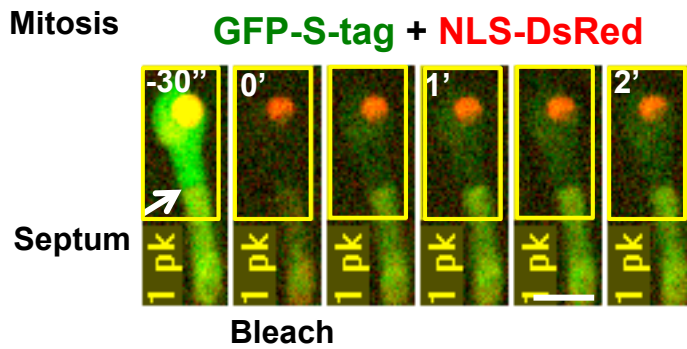

**Figure S2. A mitotic septal pore is closed.** A septum (arrowed) separates one cell in mitosis at the bottom (NLS-DsRed dispersed) from one in interphase (NLS-DsRed nuclear). As depicted by the rectangle, the top cell was photobleached and the recovery of GFP-S-tag monitored by live cell imaging. This revealed a barrier preventing rapid movement of GFP-S-tag through the septal pore when one cell is in mitosis. One pre-bleach and five post-bleach images were captured with 30 sec intervals using strain KF491.

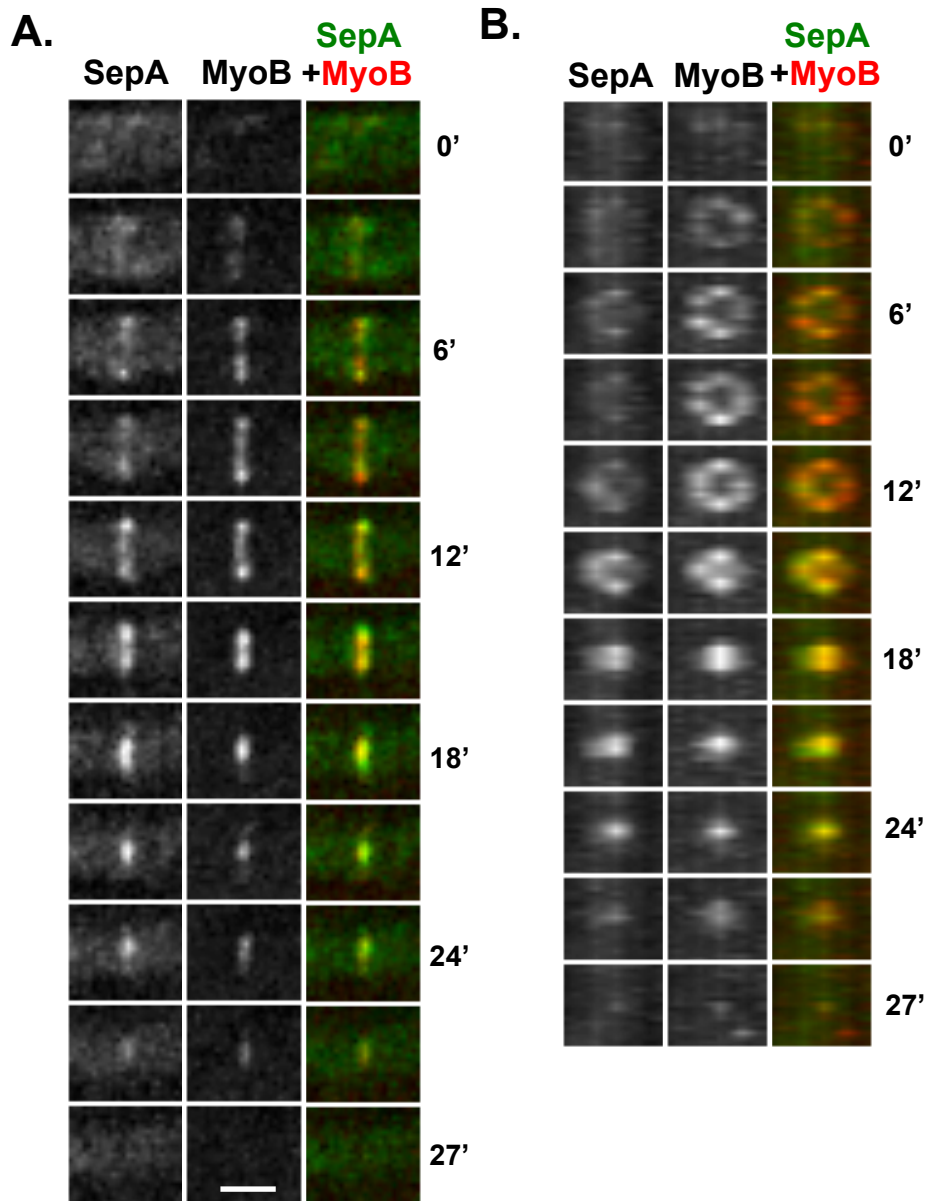

**Figure S3. SepA co-localizes with MyoB at forming septa.** (A) Time-lapse images showing SepA-GFP co-localizes with MyoB-chRFP at forming septa. Through-Z images were captured at 30 sec intervals. (B) Images of (A) were rotated 90° (using ImageJ software) for an end-on view of septum formation. Both SepA-GFP and MyoB-chRFP appear at forming septa as transient rings and then the rings fill and contract. Both SepA-GFP and MyoB-chRFP are removed as the septum is formed. Strain KF298 was used. Bars, 5  $\mu$ m.

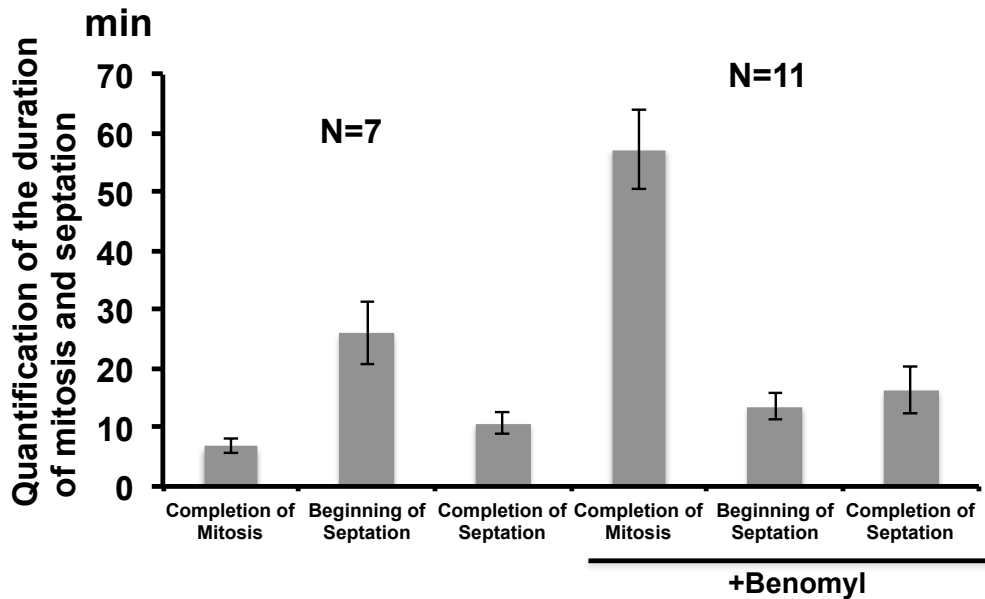

**Figure S4. Quantification of mitosis and septation times with and without microtubule functions.** In the absence or presence of benomyl, strain KF033 containing NIMA-GFP and NLS-DsRed was used for imaging and the duration of mitosis and septation was determined using NLS-DsRed as a mitotic marker and NIMA-GFP as a septation marker. The duration of mitosis was measured as the time from the dispersal of NLS-DsRed into the cytoplasm to the re-import of NLS-DsRed into the nucleus. The time between completion of mitosis and the beginning of septation was measured as the time from when the nuclear re-import of NLS-DsRed occurred to the appearance of NIMA-GFP at septation sites. The time to complete septation was measured as the time from the appearance of NIMA-GFP at septation sites to the time when NIMA-GFP first became concentrated at the middle of septa.

Supplementary Movie Information:

Movie 1: 3D reconstruction imaging of NIMA-GFP at the site of forming septum.

Frame rate = 30 fps. Rotation angle increment:  $10^\circ$ . Length of movie = 20 minutes.
